# Supplementary material for: Short-Term Meditation Training Fosters Mindfulness and Emotion Regulation: A Pilot Study
Source: Front Psychol. 2020 Oct 26;11:558803. doi: 10.3389/fpsyg.2020.558803 (PMC7649763; doi:10.3389/fpsyg.2020.558803)
Supplement: Supplementary file 1 [file Data_Sheet_1.xls]

## Sheet: Full_dataset
subject_id	ffmq_1post	ffmq_2post	ffmq_3post	ffmq_4post	ffmq_5post	ffmq_6post	ffmq_7post	ffmq_8post	ffmq_9post	ffmq_10post	ffmq_11post	ffmq_12post	ffmq_13post	ffmq_14post	ffmq_15post	ffmq_16post	ffmq_17post	ffmq_18post	ffmq_19post	ffmq_20post	ffmq_21post	ffmq_22post	ffmq_23post	ffmq_24post	ffmq_25post	ffmq_26post	ffmq_27post	ffmq_28post	ffmq_29post	ffmq_30post	ffmq_31post	ffmq_32post	ffmq_33post	ffmq_34post	ffmq_35post	ffmq_36post	ffmq_37post	ffmq_38post	ffmq_39post	ffmq_1pre	ffmq_2pre	ffmq_3pre	ffmq_4pre	ffmq_5pre	ffmq_6pre	ffmq_7pre	ffmq_8pre	ffmq_9pre	ffmq_10pre
126	2	5	3	3	2	3	5	1	4	3	3	1	2	2	3	1	2	3	3	3	4	2	1	3	3	3	5	2	2	3	3	4	3	1	3	3	5	1	4	3	5	3	3	2	5	5	2	3	3
128	3	4	3	3	4	5	4	4	1	3	4	1	4	1	4	1	1	4	2	4	4	2	5	2	4	3	4	2	2	1	4	5	4	5	2	4	4	4	5	4	4	5	4	5	4	4	3	2	4
129	3	4	3	3	3	3	3	3	2	3	3	4	3	3	3	5	4	3	3	3	3	4	3	2	3	5	3	3	2	4	5	3	3	3	4	5	3	3	2	4	3	4	3	3	5	3	3	3	3
132	5	5	1	2	2	5	5	1	3	1	2	1	1	1	5	1	3	2	4	5	5	1	1	4	2	5	3	2	5	1	5	5	3	3	1	5	5	1	3	5	5	2	5	3	5	5	1	5	3
134	2	5	2	2	3	5	4	2	2	3	2	1	3	1	4	2	3	3	3	4	2	2	1	2	2	3	4	1	2	2	5	4	1	2	3	5	4	2	3	2	4	3	4	3	5	3	2	3	2
136	3	4	2	3	4	4	3	3	3	4	1	3	3	1	3	2	2	3	1	2	1	3	3	2	3	3	3	3	2	1	2	3	3	3	2	3	3	3	3	3	4	2	3	3	4	3	2	3	3
138	4	5	1	4	1	5	5	1	4	2	4	1	2	1	5	1	1	2	4	5	4	1	1	5	1	5	5	1	4	1	5	5	4	1	1	5	5	1	1	3	4	1	5	3	3	4	2	4	2
141	5	5	2	5	2	5	5	1	4	2	5	1	3	2	5	1	3	3	4	5	4	1	2	4	2	5	4	2	4	2	5	5	4	2	2	4	4	2	3	4	5	3	3	3	4	5	3	4	3
142	4	3	1	3	4	4	4	3	2	1	3	2	4	1	4	2	1	2	3	5	2	3	2	2	1	4	4	3	3	1	4	4	3	3	2	3	3	4	3	4	3	2	3	4	5	3	4	3	2
143	4	4	2	4	2	4	4	2	3	2	3	2	2	1	3	1	1	1	3	3	3	1	2	3	1	4	4	2	4	1	4	4	4	1	1	3	4	1	2	4	4	2	4	2	3	4	2	4	3
146	4	3	1	5	2	4	4	1	4	1	5	3	3	1	5	3	1	1	4	5	4	3	1	4	1	5	3	2	4	1	5	3	3	1	1	4	3	1	1	4	3	2	3	3	2	3	2	3	3
155	4	2	3	2	4	4	3	2	2	4	2	3	3	4	4	3	3	3	2	4	3	2	2	3	4	3	3	2	2	3	4	3	2	3	4	4	4	2	4	4	3	3	3	3	4	4	2	3	2
163	4	4	3	4	3	5	4	3	3	3	4	3	3	3	5	3	3	2	4	5	4	3	3	3	2	5	4	3	4	3	5	4	3	3	2	4	4	3	3	4	4	3	3	3	5	4	3	3	3
169	3	5	3	3	3	5	4	3	3	3	5	1	4	2	5	1	2	3	3	3	4	2	2	3	2	3	5	2	3	2	5	4	3	2	2	5	5	3	3	3	5	4	3	5	4	5	4	3	4
170	5	5	2	5	2	4	4	2	4	2	4	1	2	1	5	1	1	2	4	5	4	2	2	4	1	5	5	2	4	1	4	4	4	1	1	4	4	1	2	4	4	3	4	3	5	5	2	4	2
171	3	2	3	3	4	3	3	4	3	4	4	3	3	3	3	2	3	4	3	3	3	2	3	2	3	3	3	3	2	3	3	2	2	3	3	3	2	2	3	3	3	4	2	4	2	3	4	2	3
177	3	4	3	2	4	3	4	3	3	3	3	1	4	3	3	2	3	4	3	4	3	3	3	3	3	2	4	3	3	3	4	4	3	2	3	4	4	2	2	3	4	3	3	4	3	4	3	3	3
180	3	4	3	4	4	5	3	3	3	2	4	3	3	3	5	3	3	3	3	5	3	2	3	3	3	3	3	4	3	2	5	4	3	3	3	4	4	3	3	3	3	4	3	3	5	3	3	3	2
182	3	4	3	4	3	3	4	3	3	3	4	2	3	2	4	2	3	3	4	4	3	2	2	4	2	3	4	2	5	2	5	4	4	2	3	4	4	2	2	3	4	4	3	4	3	4	2	2	3
189	4	5	2	5	2	5	4	3	4	3	4	2	3	2	5	1	2	1	5	5	5	1	1	5	1	5	5	2	4	2	4	4	2	1	1	4	5	1	3	3	4	3	2	4	5	4	3	2	3
194	4	4	1	4	2	4	5	1	3	1	4	1	1	1	5	1	1	2	3	4	4	1	3	4	2	5	5	3	4	1	5	5	4	3	1	3	5	2	2	3	5	3	4	3	3	5	3	4	2
195	4	5	3	4	3	4	4	3	3	3	4	2	3	3	4	2	3	3	4	4	4	2	3	4	3	4	4	2	4	3	4	4	3	3	2	4	4	3	3	4	4	3	4	3	4	4	3	4	2
200	3	4	4	1	4	4	5	4	2	3	4	1	4	1	4	1	3	3	2	4	3	2	4	3	3	4	4	4	2	2	4	4	1	5	2	3	4	3	2	3	3	4	5	4	3	5	3	3	4
201	5	3	1	5	1	5	5	1	5	1	5	1	1	1	5	1	1	1	5	4	5	1	1	4	1	4	4	1	5	NA	5	5	5	1	1	5	5	1	1	5	5	1	5	1	5	5	1	5	1
214	4	5	2	4	3	4	5	3	4	2	4	2	2	1	4	2	3	3	4	4	3	1	2	3	1	5	5	2	3	2	5	5	4	3	2	4	5	3	1	4	4	3	2	4	4	4	3	3	3
219	2	4	2	2	3	3	4	1	1	2	3	1	2	1	3	1	1	1	3	4	3	1	1	2	1	3	3	1	3	1	4	4	2	1	1	3	4	1	1	2	4	1	4	3	2	4	1	3	3
226	1	4	1	5	3	1	4	1	1	2	3	1	3	1	3	1	2	2	1	3	2	1	2	1	1	4	5	2	NA	1	4	5	4	1	1	2	5	3	1	2	4	4	3	3	2	4	1	5	2
228	5	3	1	4	3	4	3	2	4	2	3	2	3	1	5	3	2	3	4	5	5	2	2	4	1	4	3	2	4	1	5	3	3	2	1	4	3	2	1	3	4	3	3	4	3	2	2	2	1
229	4	5	1	1	1	4	5	1	2	1	4	1	1	1	4	1	4	1	4	4	4	1	1	4	1	4	5	1	4	1	5	4	1	1	1	4	4	1	4	4	4	1	4	2	4	4	1	4	1
233	3	5	3	3	3	3	5	3	3	2	4	1	3	2	5	1	3	2	3	4	3	1	2	3	3	4	5	3	3	2	5	5	3	3	2	3	5	3	3	NA	5	3	3	3	4	5	3	3	3
237	5	2	3	3	2	5	2	2	4	2	2	3	2	2	5	3	2	2	3	5	5	3	2	4	2	4	2	3	4	2	5	1	3	2	1	4	3	2	2	5	2	2	4	3	5	3	1	4	2
240	3	2	1	2	4	4	4	1	2	2	4	3	3	2	5	2	2	2	3	4	3	3	2	3	1	5	3	1	3	1	5	2	3	2	NA	NA	NA	NA	NA	4	2	3	3	3	5	3	1	3	3
246	4	3	3	3	3	4	2	3	3	3	3	4	5	3	4	4	3	4	2	4	3	3	3	4	3	4	3	4	3	4	4	3	3	4	4	3	3	4	4	3	2	4	3	4	3	3	4	2	4
248	3	3	2	3	3	3	3	3	3	2	2	3	3	2	4	3	2	4	3	3	3	3	3	3	2	4	3	3	3	1	4	3	3	3	2	3	3	3	2	3	3	2	3	4	3	4	3	3	2
251	2	3	4	3	4	2	4	5	3	4	1	3	4	3	2	3	4	4	3	2	4	4	3	3	4	2	3	4	4	4	2	4	2	4	4	3	4	4	3	1	3	3	3	4	2	4	4	3	4
252	3	4	1	4	1	4	5	1	3	1	1	1	1	1	4	1	1	1	4	1	2	1	1	3	1	2	5	1	3	1	5	4	3	1	1	2	5	1	1	2	4	2	4	3	3	4	2	4	2
256	5	2	2	4	2	5	3	1	4	1	4	3	4	2	4	3	1	2	3	5	4	3	2	4	1	5	3	2	3	1	5	2	2	3	1	4	3	2	1	4	4	2	3	5	5	3	2	4	1
259	2	3	1	2	3	5	4	3	3	3	1	2	3	1	3	NA	1	2	2	2	4	3	1	2	3	1	3	2	1	2	3	2	2	1	2	1	2	1	3	2	3	1	3	4	5	4	2	3	2
260	1	3	4	2	4	5	3	3	2	4	3	3	4	2	2	3	3	3	3	3	4	2	3	4	4	3	2	3	3	3	4	2	2	3	2	3	2	3	4	1	3	4	3	4	3	3	2	2	4
261	NA	NA	NA	NA	NA	NA	NA	NA	NA	NA	NA	NA	NA	NA	NA	NA	NA	NA	NA	NA	NA	NA	NA	NA	NA	NA	5	2	2	1	5	4	1	2	3	4	4	2	5	2	4	4	3	3	1	5	3	1	3
266	4	4	2	4	2	4	4	1	4	2	4	1	2	1	4	1	2	2	4	4	2	4	1	4	1	4	4	2	3	2	4	4	4	2	2	4	4	1	1	4	5	2	4	2	5	5	1	4	1
269	3	4	1	4	3	4	4	1	3	1	3	1	3	1	4	1	1	2	4	4	4	1	2	3	1	4	3	2	3	1	4	3	4	2	1	4	4	2	1	2	3	1	4	3	3	4	2	3	3
[truncated: 139 more columns]
